# Supplementary material for: Surface engineering of zinc phthalocyanine organic thin-film transistors results in part-per-billion sensitivity towards cannabinoid vapor
Source: Springer Nature journal article supplement (doi:10.1038/s42004-022-00797-y), 2022-12-24
Supplement: MOESM1 [file 42004_2022_797_MOESM1_ESM.pdf]

## Supplemental Information

### Surface engineering of zinc phthalocyanine organic thin-film transistors results in part-per-billion sensitivity towards cannabinoid vapor

Zachary J. Comeau<sup>1,2</sup>, Rosemary R. Cranston<sup>1</sup>, Halyne Lamontagne<sup>1,2</sup>, Cory S. Harris<sup>2,3</sup>, Adam J. Shuhendler<sup>2,3,4\*</sup> and Benoît H. Lessard<sup>1,5\*</sup>

<sup>1</sup>*Department of Chemical and Biological Engineering, University of Ottawa, 161 Louis Pasteur, Ottawa, ON, Canada, K1N 6N5*

<sup>2</sup>*Department of Chemistry and Biomolecular Sciences, University of Ottawa, 150 Louis Pasteur, Ottawa, ON, Canada K1N 6N5*

<sup>3</sup>*Department of Biology, University of Ottawa, 30 Marie Curie, Ottawa, ON, Canada K1N 6N5*

<sup>4</sup>*University of Ottawa Heart Institute, 40 Ruskin St, Ottawa, ON, Canada K1Y 4W7*

<sup>5</sup>*School of Electrical Engineering and Computer Science, University of Ottawa, 800 King Edward Ave. Ottawa, ON, Canada, K1N 6N5*

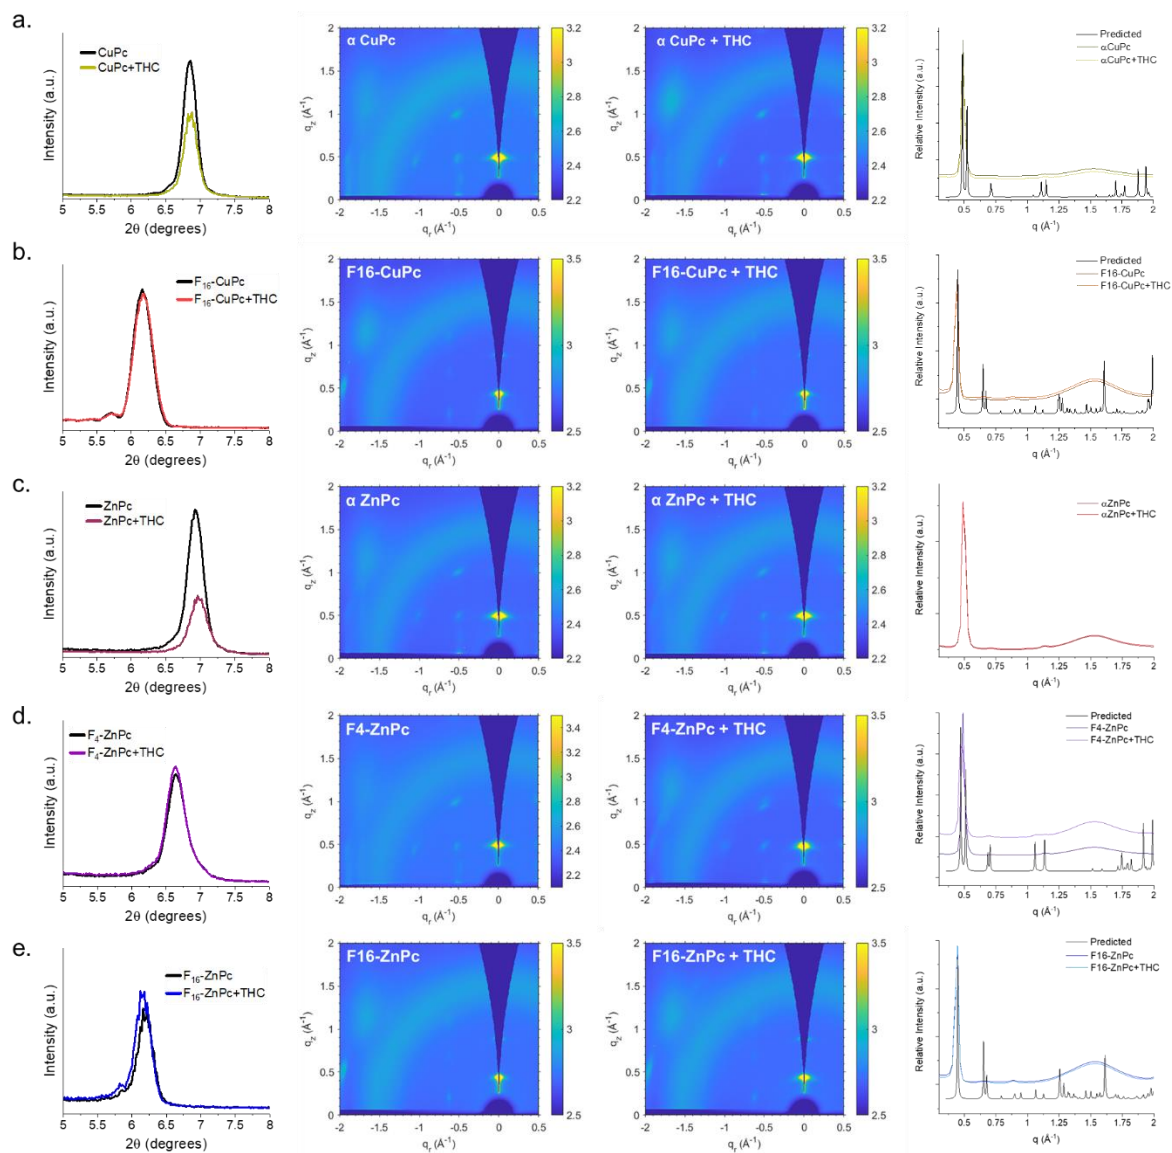

Figure S1. XRD, 2D scattering patterns ( $\theta = 0.3^\circ$ ), and diffraction patterns predicted from single crystal and determined by GIWAXS of pre- and post- exposure films to THC vapor (a)  $\alpha$ -CuPc (CCDC #219250)<sup>1</sup>, (b) F<sub>16</sub>-CuPc (CCDC #698474)<sup>2</sup>, (c)  $\alpha$ -ZnPc, (d) F<sub>4</sub>-ZnPc (CCDC #1818040)<sup>3</sup>, and (e) F<sub>16</sub>-ZnPc (CCDC #1013162)<sup>4</sup>.

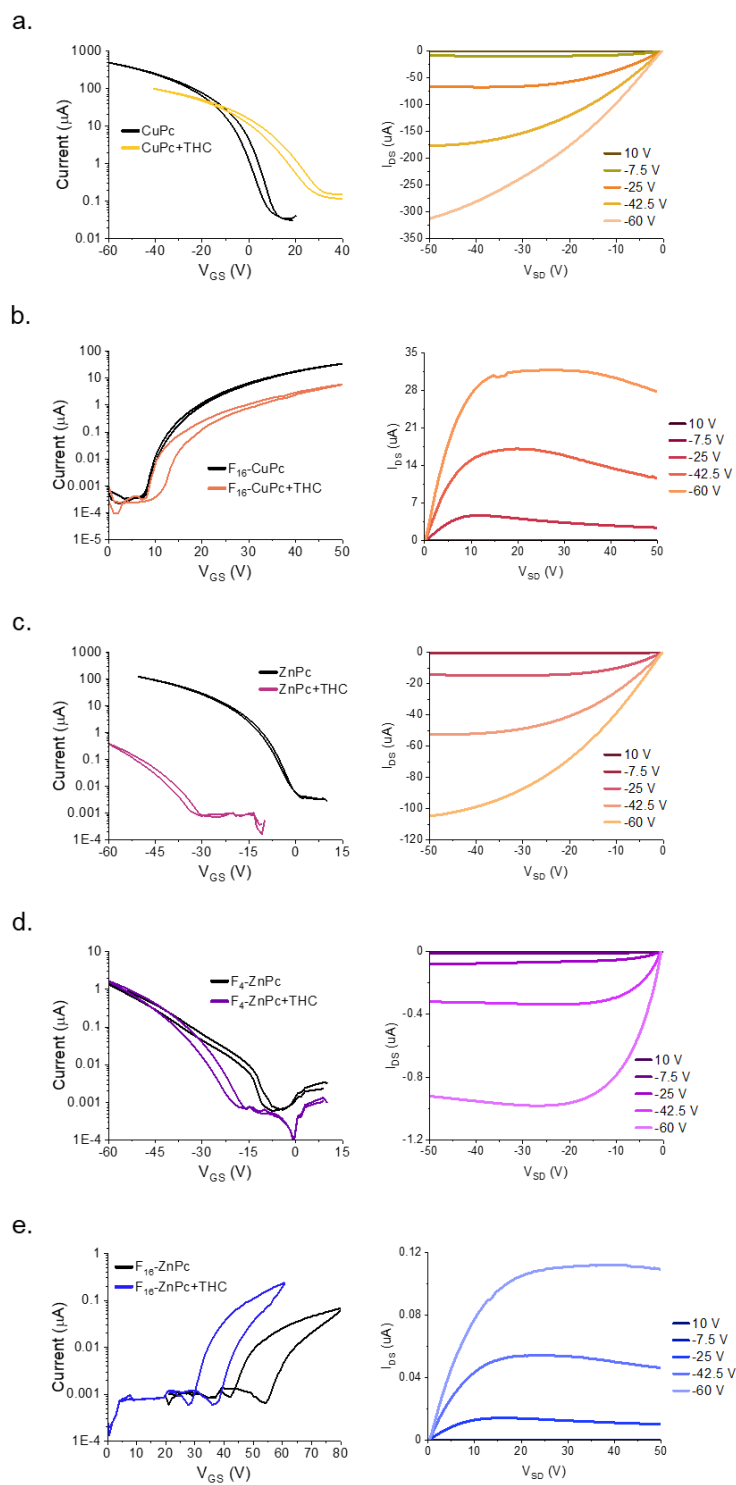

Figure S2. Characteristic transfer and output curves of Pc thin-films pre- and post- exposure to THC vapor. Twenty (a) CuPc, (b) F<sub>16</sub>-CuPc, (c) ZnPc, (d) F<sub>4</sub>-ZnPc, and (e) F<sub>16</sub>-ZnPc OTFTs were characterized and then exposed to 4 ppm THC vapor over a period of 90 seconds.

Table S1. Calculated transfer data pre- and post- THC vapor exposure for morphologically different films<sup>a</sup>

|                                                | Low               |                   | Med               |                   | High              |                   | Very High         |                   |
|------------------------------------------------|-------------------|-------------------|-------------------|-------------------|-------------------|-------------------|-------------------|-------------------|
|                                                | Baseline          | +THC              | Baseline          | +THC              | Baseline          | +THC              | Baseline          | +THC              |
| Peak Mobility [ $10^{-2}$ cm <sup>2</sup> /Vs] | 2.5±0.2           | 1.8±0.3           | 2.4±0.1           | 2.0±0.2           | 2.9±0.2           | 2.6±0.2           | 2.7±0.1           | 2.7±0.1           |
| Voltage Threshold [V]                          | -2.8±0.4          | -19.3±2.1         | -8.2±0.7          | -12.6±0.8         | -6.8±1.0          | -8.9±0.8          | -11.4±1.1         | -8.2±1.2          |
| Defect Density [ $10^{12}$ /cm <sup>2</sup> V] | 12.3±1.3          | 21.4±2.3          | 13.7±0.8          | 15.4±1.0          | 7.51±0.5          | 12.5±0.8          | 4.23±0.4          | 9.9±0.7           |
| Maximum Hysteresis [V]                         | 1.6               | 6.1               | 1.3               | 2.5               | 1.1               | 3.2               | 0                 | 2.1               |
| On/Off Ratio                                   | 4·10 <sup>3</sup> | 2·10 <sup>3</sup> | 4·10 <sup>3</sup> | 4·10 <sup>3</sup> | 1·10 <sup>4</sup> | 7·10 <sup>3</sup> | 7·10 <sup>4</sup> | 2·10 <sup>4</sup> |

a. Mobility, voltage threshold, and defect density was calculated from the transfer data of 18 OTFTs for each condition and averaged.

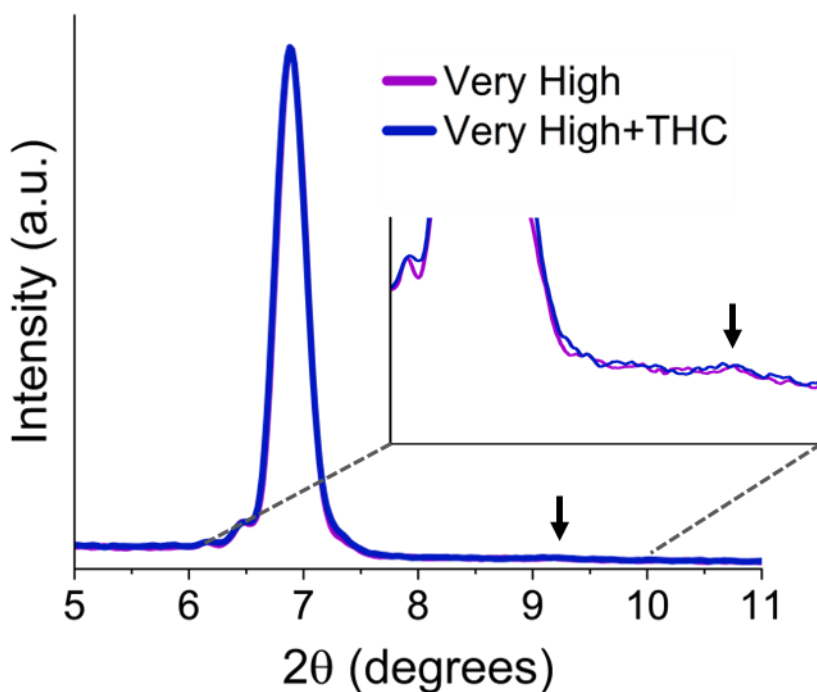

Figure S3. XRD spectra of very high crystallinity ZnPc thin-films pre- and post-THC vapor exposure, with inset showing spectra between 6 and 10 degrees  $2\theta$ . ZnPc thin-films were deposited at a rate of 0.2 Å/s and 180°C with a pre-deposited monolayer of p-sexiphenyl (p-6P) before being exposed to 400 ppb THC vapor over 90 seconds.

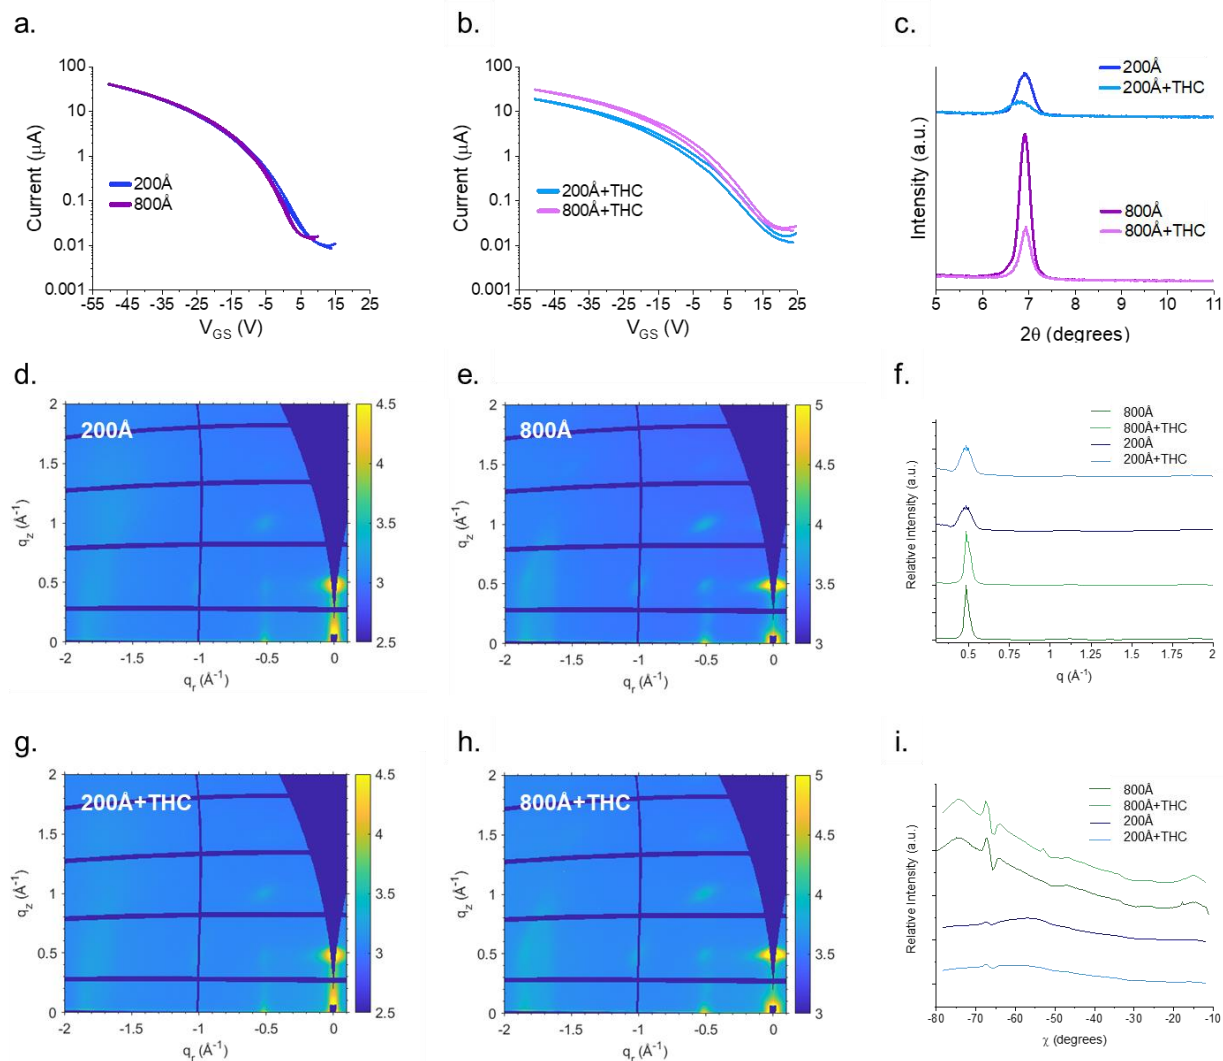

Figure S4. Effects of thickness on THC vapor sensitivity of ZnPc thin films. Transfer curves of 200 and 800  $\text{\AA}$  ZnPc OTFTs (a) pre- and (b) post- THC vapor exposure. (c) XRD spectra of thin-films pre- and post-exposure. 2D scattering patterns ( $\theta = 0.1^\circ$ ) of (d, g) 200 and (e, h) 800  $\text{\AA}$   $\alpha$ -ZnPc pre- and post- exposure to THC vapor. (f) Diffraction patterns determined by GIWAXS and (i) linecut profiles with respect to  $\chi$  using a  $q$  range between 1.9-2.1  $\text{\AA}^{-1}$ .

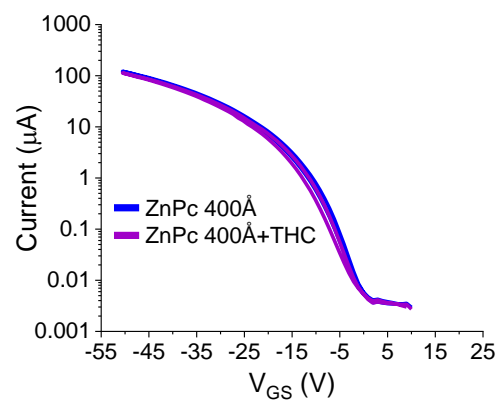

Figure S5: Initially screened ZnPc OTFT transfer curves pre- and post- exposure to 40 ppb THC vapor for 90 seconds. Films were deposited at a rate of 0.2 Å/s.

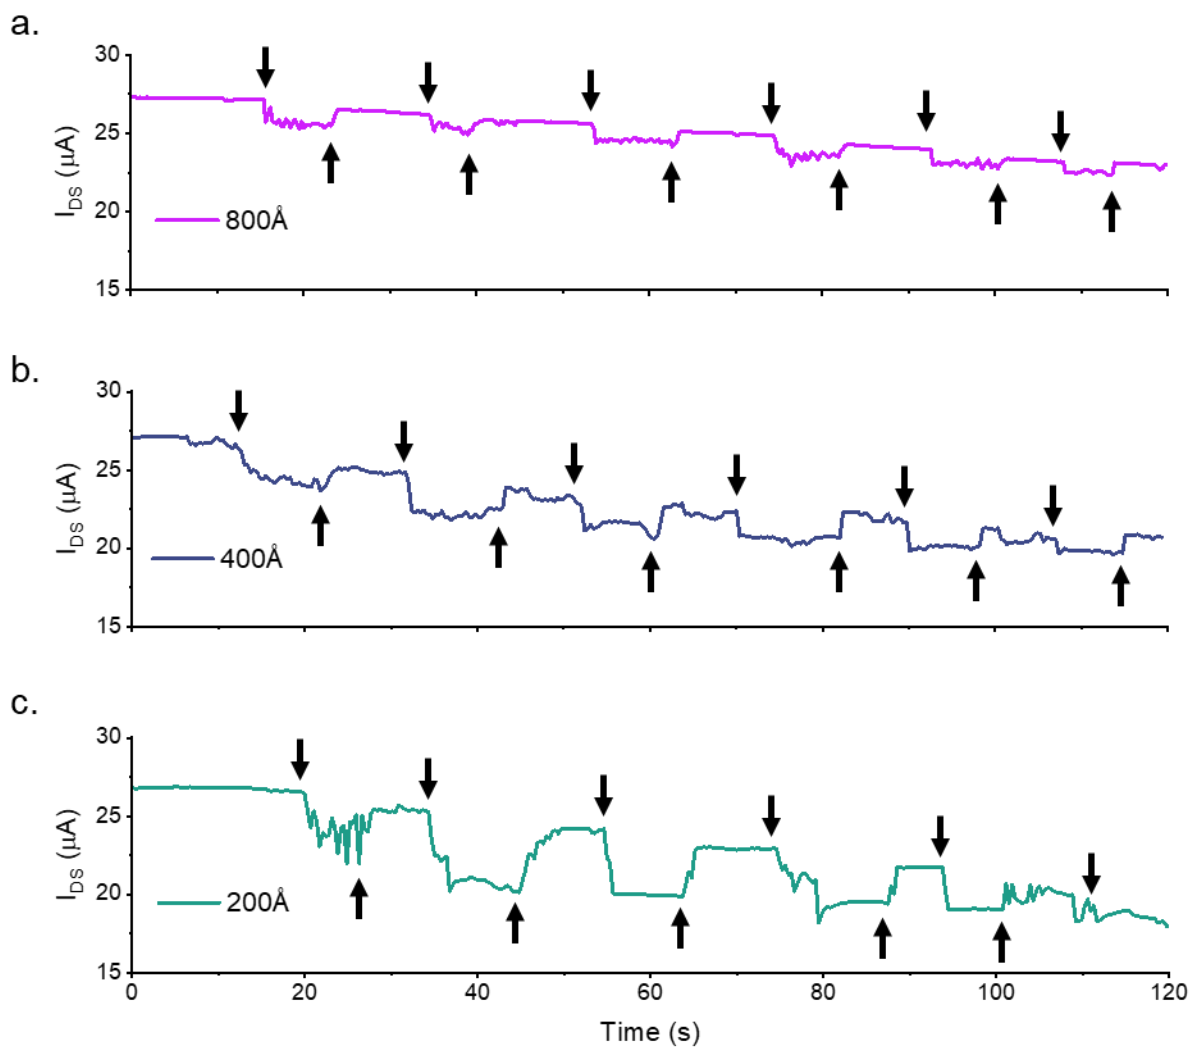

Figure S6. Periodic in-situ THC vapor exposure and detection. The effects of periodic THC exposure on (a) 800, (b) 400, and (c) 200 Å ZnPc OTFTs. A  $V_{SD}$  of -50 V was held and a  $V_{GS}$  of -40 V and was pulsed at a rate of 20 milliseconds on 80 milliseconds off over a period of 120 seconds. 40 ppb THC vapor was introduced to a 50 mL chamber.

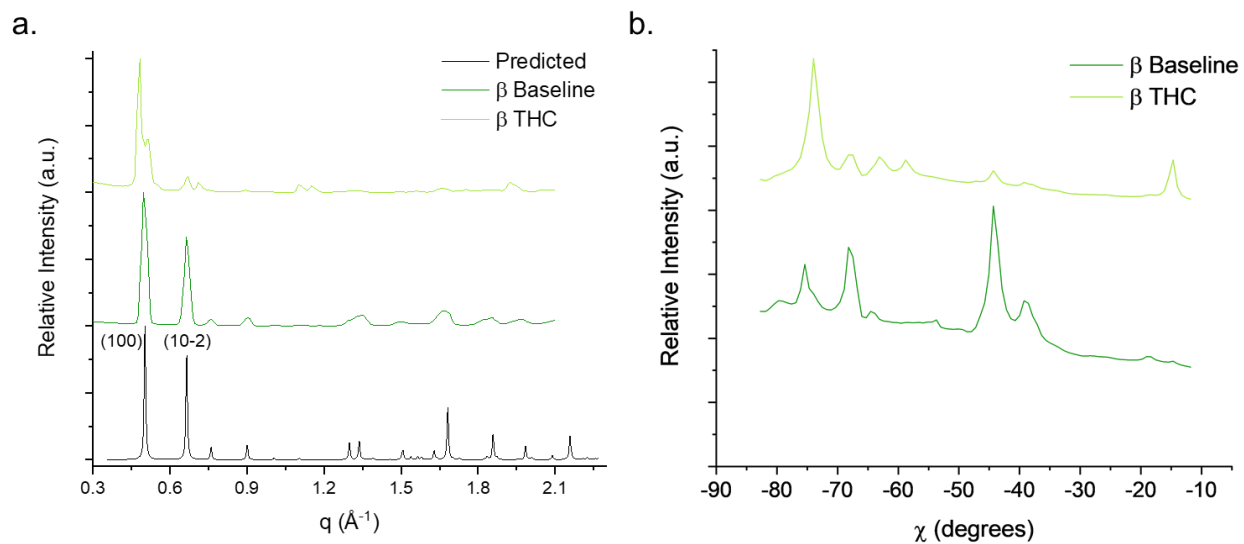

Figure S7. (a) Diffraction pattern of  $\beta$ -ZnPc predicted from single crystal (CCDC #2098417)<sup>3</sup> and  $\beta$ -ZnPc pre- and post- exposure to THC vapor determined by GIWAXS. (b) Linecut profiles of pre- and post- exposed  $\beta$ -ZnPc with respect to  $\chi$  using a  $q$  range between 1.9-2.1  $\text{\AA}^{-1}$ .

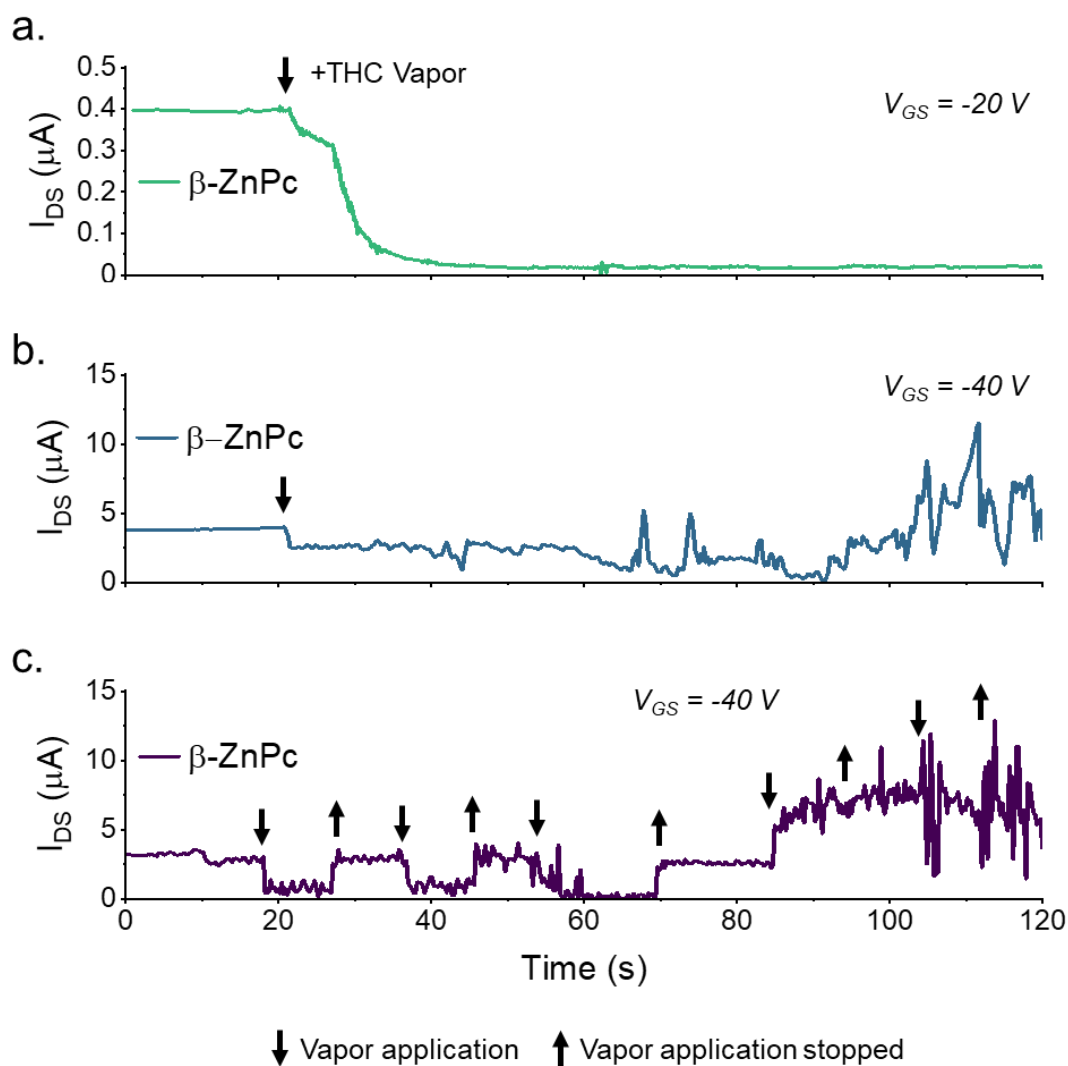

Figure S8. Continuous and periodic in-situ THC vapor exposure and detection. The effects of (a) continuous THC exposure when  $V_{GS} = -20\text{V}$ , (b) continuous THC exposure when  $V_{GS} = -40\text{V}$ , and (c) periodic THC exposure when  $V_{GS} = -20\text{V}$  on  $\beta\text{-ZnPc}$  OTFTs. A  $V_{SD}$  of  $-50\text{ V}$  was held and  $V_{GS}$  was pulsed at a rate of 20 ms on 80 ms off over a period of 120 seconds. 400 ppb THC vapor was introduced to a 50 mL chamber.

## References

1. Hoshino, A., Takenaka, Y. & Miyaji, H. Redetermination of the crystal structure of  $\alpha$ -copper phthalocyanine grown on KCl. *Acta Crystallogr. Sect. B Struct. Sci.* **59**, 393–403 (2003).
2. Yoon, S. M., Song, H. J., Hwang, I. C., Kim, K. S. & Choi, H. C. Single crystal structure of copper hexadecafluorophthalocyanine (F16CuPc) ribbon. *Chem. Commun.* **46**, 231–233 (2009).
3. Li, D. *et al.* Green synthesis and characterization of crystalline zinc phthalocyanine and cobalt phthalocyanine prisms by a simple solvothermal route. *CrystEngComm* **20**, 2749–2758 (2018).
4. Jiang, H. *et al.* Fluorination of Metal Phthalocyanines: Single-Crystal Growth, Efficient N-Channel Organic Field-Effect Transistors and Structure-Property Relationships. *Sci. Reports 2014 41* **4**, 1–6 (2014).
